# Supplementary material for: Electrical conductivity of the global ocean
Source: PubMed Central journal article supplement (PMC6959386; doi:10.1186/s40623-017-0739-7), 2017-11-14
Supplement: 40623_2017_739_MOESM1_ESM.pdf [file 40623_2017_739_MOESM1_ESM.pdf]

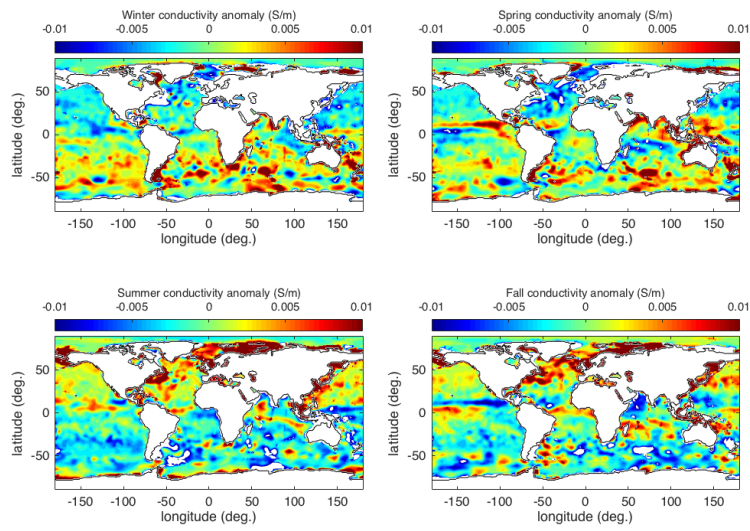

Fig S1: Depth-averaged conductivity anomaly (relative to annual mean) for each of the four seasons. The full range in the data are, respectively,  $-0.660$ — $0.556$  (S/m),  $-0.471$ — $0.317$  (S/m),  $-0.511$ — $0.721$  (S/m),  $-0.502$ — $0.594$  (S/m).
